# Supplementary material for: Resilience of Octocoral Forests to Catastrophic Storms
Source: PubMed Central journal article supplement (PMC7063042; doi:10.1038/s41598-020-61238-1), 2020-03-09
Supplement: 41598_2020_61238_MOESM1_ESM.pdf [file 41598_2020_61238_MOESM1_ESM.pdf]

## Resilience of Octocoral Forests to Catastrophic Storms

Lasker<sup>1\*</sup> HR, Martínez-Quintana<sup>1</sup> Á, Bramanti<sup>2</sup> L, Edmunds<sup>3</sup> PJ

### Supplementary Information

Table 1. ANOVA\* of octocoral densities (ln transformed) in 1 m<sup>2</sup> quadrats from censuses July 2014 through July 2018 at 3 sites on St. John Virgin Is.

| Source      | Type III Sum of Squares | df  | Mean Square | F       | Sig.   |
|-------------|-------------------------|-----|-------------|---------|--------|
| Site        | 184.938                 | 2   | 92.469      | 359.009 | <0.001 |
| Year        | 14.991                  | 5   | 2.998       | 11.641  | <0.001 |
| Site * Year | 2.620                   | 9   | .291        | 1.130   | 0.338  |
| Error       | 214.812                 | 834 | .258        |         |        |
| Total       | 3533.491                | 851 |             |         |        |

### Homogeneous Groups of Years

|                      |               | Year | N      | Group  |   |        |
|----------------------|---------------|------|--------|--------|---|--------|
|                      |               |      |        | 1      | 2 | 3      |
| Student-Newman-Keuls | November 2017 | 146  | 1.6076 |        |   |        |
|                      | 2018          | 150  |        | 1.8581 |   |        |
|                      | 2015          | 152  |        | 1.8771 |   |        |
|                      | July 2017     | 144  |        | 1.8958 |   |        |
|                      | 2016          | 148  |        | 1.9088 |   |        |
|                      | 2014          | 111  |        |        |   | 2.3933 |

### Homogeneous Groups of Sites

|                      |               | Site | N      | Group |        |        |
|----------------------|---------------|------|--------|-------|--------|--------|
|                      |               |      |        | 1     | 2      | 3      |
| Student-Newman-Keuls | Tektite       | 267  | 1.2628 |       |        |        |
|                      | Europa        | 356  |        |       | 1.9494 |        |
|                      | East Cabritte | 228  |        |       |        | 2.5821 |

**Estimated marginal means - Site by Year**

| Site             |          | Mean<br>Ln(Density) | Std.<br>Error | 95% Confidence<br>Interval |                |
|------------------|----------|---------------------|---------------|----------------------------|----------------|
|                  |          |                     |               | Lower<br>Bound             | Upper<br>Bound |
| East<br>Cabritte | 2018     | 2.299               | 0.067         | 2.168                      | 2.429          |
|                  | November |                     |               |                            |                |
|                  | 2017     | 2.427               | 0.093         | 2.246                      | 2.609          |
|                  | 2015     | 2.682               | 0.091         | 2.504                      | 2.861          |
|                  | 2017     | 2.697               | 0.096         | 2.509                      | 2.886          |
|                  | 2016     | 2.736               | 0.093         | 2.554                      | 2.918          |
|                  | 2014     | 2.781               | 0.071         | 2.641                      | 2.920          |
| Europa           | 2018     | 1.753               | 0.067         | 1.622                      | 1.884          |
|                  | November |                     |               |                            |                |
|                  | 2017     | 1.766               | 0.066         | 1.636                      | 1.896          |
|                  | 2016     | 2.027               | 0.066         | 1.897                      | 2.157          |
|                  | 2015     | 2.036               | 0.066         | 1.907                      | 2.164          |
|                  | 2017     | 2.043               | 0.066         | 1.914                      | 2.171          |
|                  | 2014     | 2.064               | 0.066         | 1.935                      | 2.193          |
| Tektite          | November |                     |               |                            |                |
|                  | 2017     | 1.012               | 0.067         | 0.880                      | 1.144          |
|                  | 2018     | 1.285               | 0.087         | 1.114                      | 1.456          |
|                  | 2015     | 1.312               | 0.065         | 1.184                      | 1.439          |
|                  | 2017     | 1.338               | 0.068         | 1.205                      | 1.471          |
|                  | 2016     | 1.370               | 0.066         | 1.240                      | 1.500          |

\* ANOVA – Univariate analysis of variance function in SPSS v 26

Table 2. Octocoral species present in monitoring surveys

|                                                 | East Cabritte |      |      |      |          |      | Europa |      |      |      |          |      | Tektite |      |      |          |      |
|-------------------------------------------------|---------------|------|------|------|----------|------|--------|------|------|------|----------|------|---------|------|------|----------|------|
|                                                 | 2014          | 2015 | 2016 | 2017 | Nov 2017 | 2018 | 2014   | 2015 | 2016 | 2017 | Nov 2017 | 2018 | 2015    | 2016 | 2017 | Nov 2017 | 2018 |
| <i>Antillogorgia americana</i>                  | X             | X    | X    | X    | X        | X    | X      | X    | X    | X    | X        | X    | X       | X    | X    | X        | X    |
| <i>Antillogorgia acerosa</i>                    |               | X    | X    | X    | X        | X    |        | X    | X    | X    | X        | X    | X       | X    | X    | X        | X    |
| <i>Antillogorgia hummelincki</i>                |               |      |      |      |          |      |        |      | X    |      |          |      |         |      |      |          |      |
| <i>Antillogorgia rigida</i>                     | X             | X    | X    |      | X        | X    | X      | X    | X    | X    |          | X    | X       | X    | X    | X        | X    |
| <i>Briareum asbestinum</i><br>(upright form)    | X             | X    |      | X    |          | X    | X      | X    | X    | X    | X        | X    | X       | X    | X    | X        | X    |
| <i>Eunicea asperula</i>                         |               | X    | X    | X    | X        | X    | X      |      |      |      | X        | X    |         |      |      | X        |      |
| <i>Eunicea calyculata</i>                       | X             | X    | X    | X    | X        | X    | X      | X    | X    | X    | X        | X    | X       | X    | X    |          |      |
| <i>Eunicea calyculata f.</i><br><i>coronata</i> | X             |      |      |      |          | X    |        |      |      |      |          |      |         |      |      |          |      |
| <i>Eunicea clavigera</i>                        | X             | X    | X    | X    | X        | X    | X      | X    | X    |      | X        | X    | X       |      |      |          | X    |
| <i>Eunicea flexuosa</i>                         | X             | X    | X    | X    | X        | X    | X      | X    | X    | X    | X        | X    | X       | X    | X    | X        | X    |
| <i>Eunicea fusca</i>                            | X             | X    | X    | X    | X        | X    | X      | X    | X    | X    | X        | X    |         | X    | X    |          |      |
| <i>Eunicea knighti</i>                          |               |      |      |      | X        |      |        |      |      |      |          |      |         |      |      |          |      |
| <i>Eunicea lacinata</i>                         | X             | X    | X    | X    | X        | X    | X      | X    | X    | X    | X        |      |         |      | X    |          |      |



Lasker et al.

Octocoral forests on Caribbean reefs

|                                            |   |   |   |   |   |   |   |   |   |   |   |   |   |   |   |   |   |   |
|--------------------------------------------|---|---|---|---|---|---|---|---|---|---|---|---|---|---|---|---|---|---|
| <i>Pseudoplexaura flagellosa/wagenaari</i> | X | X | X | X | X | X | X | X | X | X | X | X | X | X | X | X | X | X |
| <i>Plexaurella grisea</i>                  | X | X |   | X |   | X | X |   | X | X |   | X | X |   | X |   | X |   |
| <i>Pterogorgia guadalupensis</i>           | X | X | X |   |   | X | X | X | X | X | X | X |   |   |   |   |   |   |
| <i>Plexaura homomalla</i>                  | X | X | X | X | X | X | X | X | X | X | X |   |   | X | X | X |   |   |
| <i>Plexaura kukenthali</i>                 | X | X | X | X | X | X | X | X | X | X |   | X | X | X | X | X | X |   |
| <i>Plexaura kuna</i>                       | X | X | X | X | X | X | X | X | X |   | X | X | X | X | X | X | X |   |
| <i>Plexaurella sp.</i>                     | X |   |   |   | X |   | X | X | X |   |   |   |   | X | X | X |   |   |
| <i>Plexaurella nutans</i>                  | X | X | X | X |   | X | X | X | X | X | X | X | X | X | X | X | X |   |
| <i>Pseudoplexaura porosa</i>               | X | X | X | X | X | X | X |   | X | X | X | X |   | X | X | X | X |   |
| <i>Antillogorgia sp.</i>                   |   |   |   |   |   |   |   |   |   |   |   |   |   |   |   |   |   |   |
| <i>Eunicea spp.</i>                        | X | X | X | X | X | X | X | X | X | X | X | X | X | X | X |   | X |   |
| <i>Muricea spp.</i>                        | X |   |   |   |   |   | X | X |   |   |   |   |   |   |   |   |   |   |
| <i>Pterogorgia spp.</i>                    |   |   |   |   |   |   |   | X |   |   |   |   |   |   |   |   |   |   |
| <i>Pseudoplexaura spp.</i>                 | X |   | X | X |   |   |   | X | X |   | X |   | X |   |   |   |   |   |

Table 3. Generalized Linear Analysis\* of recruit densities in 0.25 m<sup>2</sup> quadrats at three sites on St. John, U.S. Virgin Islands.

| <b>Tests of Model Effects</b> |                 |    |       |  |
|-------------------------------|-----------------|----|-------|--|
| Source                        | Wald Chi-Square | df | Sig.  |  |
| (Intercept)                   | 17599.768       | 1  | 0.000 |  |
| Site                          | 411.954         | 2  | 0.000 |  |
| Census                        | 42.445          | 5  | 0.000 |  |
| Site * Census                 | 30.323          | 10 | 0.001 |  |

#### **Estimated Marginal Means 1: Site**

| Site             | Mean*  | Std. Error | 95% Wald Confidence Interval |        |
|------------------|--------|------------|------------------------------|--------|
|                  |        |            | Lower                        | Upper  |
| East<br>Cabritte | 1.2298 | .01359     | 1.2032                       | 1.2565 |
| Europa           | 1.0605 | .01356     | 1.0339                       | 1.0870 |
| Tektite          | .8391  | .01371     | .8122                        | .8659  |

#### **Estimated Marginal Means 2: Census**

| Census | Mean*  | Std. Error | 95% Wald Confidence Interval |        |
|--------|--------|------------|------------------------------|--------|
|        |        |            | Lower                        | Upper  |
| 2015   | 1.0274 | .01899     | .9901                        | 1.0646 |
| 2016   | 1.0651 | .01956     | 1.0267                       | 1.1034 |
| 2017   | 1.0921 | .01872     | 1.0554                       | 1.1288 |
| 2018   | 1.0155 | .01992     | .9765                        | 1.0546 |
| 2019   | 1.1049 | .01885     | 1.0680                       | 1.1418 |

|          |       |        |       |       |
|----------|-------|--------|-------|-------|
| Nov 2017 | .9537 | .01950 | .9155 | .9920 |
|----------|-------|--------|-------|-------|

**Estimated Marginal Means 3: Site\* Census**

| Site             | Census   | Mean*  | Std.<br>Error | 95% Wald Confidence Interval |        |
|------------------|----------|--------|---------------|------------------------------|--------|
|                  |          |        |               | Lower                        | Upper  |
| East<br>Cabritte | 2015     | 1.2325 | .03198        | 1.1698                       | 1.2952 |
|                  | 2016     | 1.2290 | .03335        | 1.1637                       | 1.2944 |
|                  | 2017     | 1.3472 | .03198        | 1.2845                       | 1.4099 |
|                  | 2018     | 1.1779 | .03335        | 1.1126                       | 1.2433 |
|                  | 2019     | 1.3467 | .03264        | 1.2827                       | 1.4107 |
|                  | Nov 2017 | 1.0457 | .03622        | .9747                        | 1.1167 |
| Europa           | 2015     | 1.0257 | .03335        | .9604                        | 1.0911 |
|                  | 2016     | 1.0836 | .03490        | 1.0152                       | 1.1520 |
|                  | 2017     | 1.0644 | .03264        | 1.0004                       | 1.1284 |
|                  | 2018     | 1.0555 | .03335        | .9901                        | 1.1208 |
|                  | 2019     | 1.1424 | .03264        | 1.0784                       | 1.2063 |
|                  | Nov 2017 | .9913  | .03231        | .9280                        | 1.0546 |
| Tektite          | 2015     | .8239  | .03335        | .7585                        | .8892  |
|                  | 2016     | .8826  | .03335        | .8173                        | .9480  |
|                  | 2017     | .8648  | .03264        | .8009                        | .9288  |
|                  | 2018     | .8132  | .03669        | .7413                        | .8851  |
|                  | 2019     | .8256  | .03264        | .7616                        | .8896  |
|                  | Nov 2017 | .8242  | .03264        | .7603                        | .8882  |

\*Analysis based on natural log of the square root of density using a normal distribution in the GLM function in SPSS v. 26.

Table 4. Kruskal-Wallis comparison of numbers of recruits found in 0.25 m<sup>2</sup> quadrats (48 per site and time) in censuses between 2015 and 2019 at three sites on the south shore of St. John, U.S. Virgin Islands. November 2017 census conducted 2 months after the passage of Hurricanes Irma and Maria. Pairwise values are probabilities that the 2 time periods had the same recruitment. Significant values ( $p < 0.05$ ) are in bold. Probabilities are not adjusted for multiple comparisons. Bonferroni correction sets the critical value for rejection of the hypothesis at  $p = 0.003$ . Censuses are listed in order of decreasing recruit abundance. Letters in parentheses identify homogeneous groups identified in stepwise Kruskal-Wallis comparisons.

EAST CABRITTE (Kruskal-Wallis test of independence across all censuses,  $p < 0.001$ )

|                   | 2017  | 2016  | 2015         | 2018         | November<br>2017 |
|-------------------|-------|-------|--------------|--------------|------------------|
| 2019 (A)          | 0.930 | 0.058 | <b>0.039</b> | <b>0.004</b> | <b>&lt;0.001</b> |
| 2017 (A,B)        |       | 0.067 | <b>0.046</b> | <b>0.004</b> | <b>&lt;0.001</b> |
| 2016 (A,B,C)      |       |       | 0.904        | 0.316        | <b>0.003</b>     |
| 2015 (B,C)        |       |       |              | 0.367        | <b>0.004</b>     |
| 2018 (B,C)        |       |       |              |              | <b>0.044</b>     |
| November 2017 (D) |       |       |              |              |                  |

EUROPA (Kruskal-Wallis test of independence across all censuses,  $p = 0.043$ )

|                   | 2016  | 2017  | 2018         | 2015         | November<br>2017 |
|-------------------|-------|-------|--------------|--------------|------------------|
| 2019 (A)          | 0.247 | 0.129 | <b>0.015</b> | <b>0.015</b> | <b>0.002</b>     |
| 2016 (A,B)        |       | 0.729 | 0.543        | 0.228        | 0.063            |
| 2017 (A,B)        |       |       | 0.784        | 0.372        | 0.118            |
| 2018 (A,B)        |       |       |              | 0.540        | 0.204            |
| 2015 (A,B)        |       |       |              |              | 0.516            |
| November 2017 (B) |       |       |              |              |                  |

TEKTITE (Kruskal-Wallis test of independence across all censuses,  $p = 0.532$ )



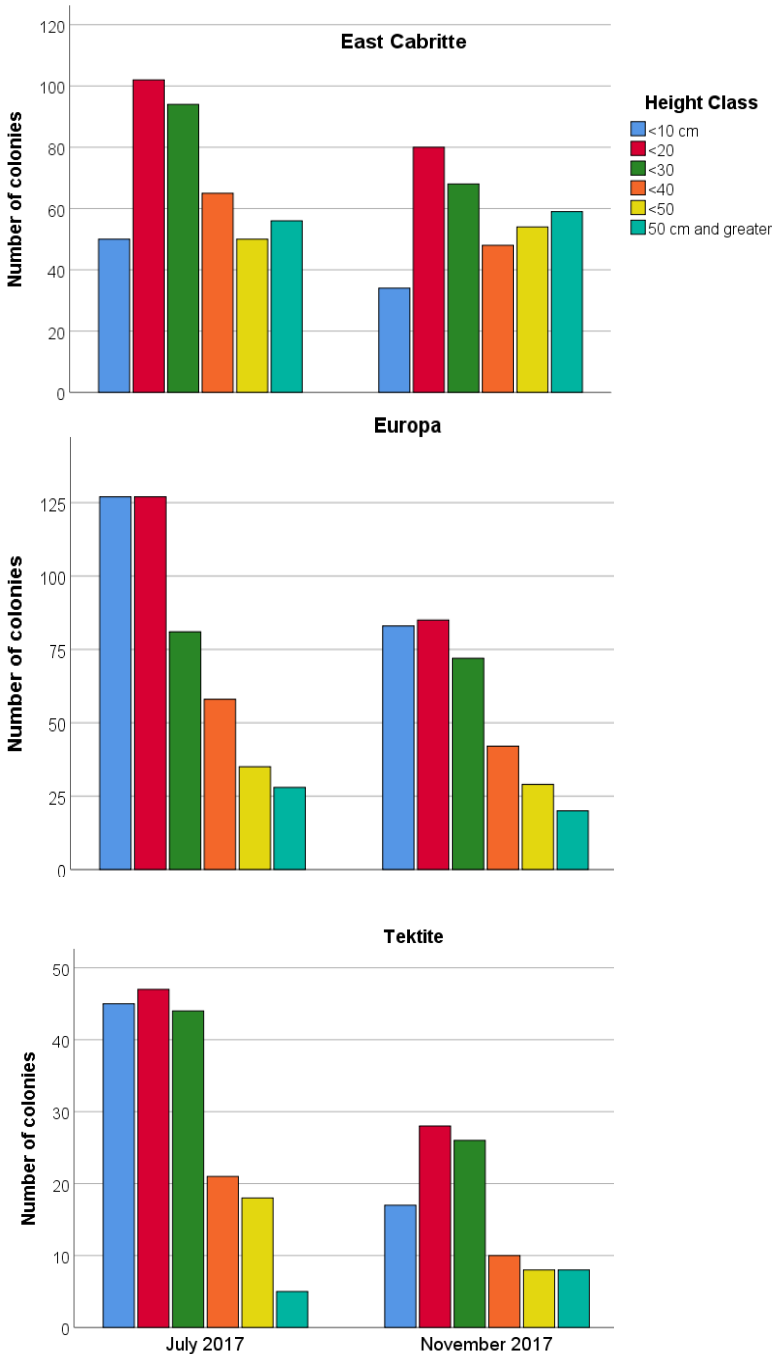

Figure 1. Size-frequency distributions of octocoral colony heights at three sites on St. John before (July 2017) and after (November 2017) Hurricanes Irma and Maria. Distributions differ among sites (Log-linear analysis, site  $\times$  height, partial Chi square = 110.4, df = 10,  $p < 0.001$ ) but not by year (Loglinear analysis, height  $\times$  year, partial Chi square = 7.1, df = 5,  $p = 0.22$ ; Likelihood ratio analysis for each site - East Cabritte, Likelihood ratio = 5.51, df = 5,  $p = 0.36$ ; Europa Bay, Likelihood ratio = 2.73, df = 5,  $p = 0.74$ ; Tektite, Likelihood ratio = 9.04, df = 5,  $p = 0.30$ )

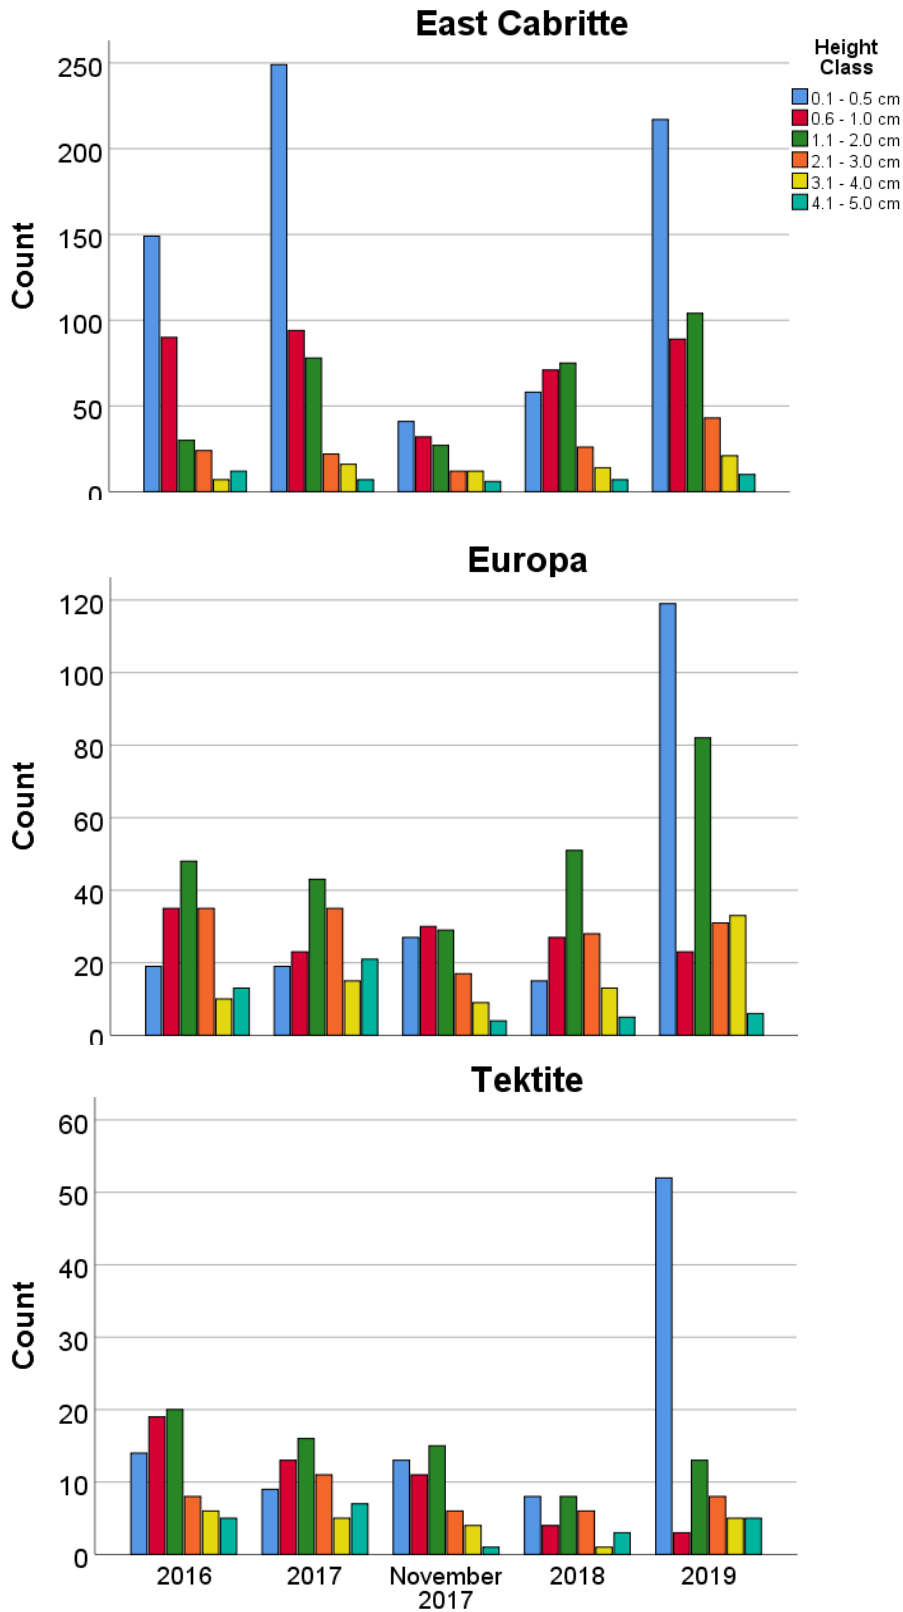

Figure 2. Size frequency distributions of recruits at 3 sites on St. John, U.S. Virgin Is.
